# Supplementary material for: Synthesis and characterization of [Ru(NCNHCO)(bpy)L]+ complexes and their reactivity towards water oxidation
Source: Royal Society of Chemistry journal article supplement (doi:10.1039/c7nj03198j), 2018-01-01
Supplement: c7nj03198j1.pdf [file c7nj03198j1.pdf]

## Supporting information

### Synthesis and Characterization of $[\text{Ru}(\text{NC}^{\text{NHC}}\text{O})(\text{bpy})\text{L}]^+$ Complexes and Their Reactivity towards Water Oxidation

Fanglin Cai, <sup>†</sup>[a] Wei Su, <sup>†</sup> [a] Hussein A. Younus, [d] Kui Zhou, [a] Cheng Chen, [a] Somboon Chaemchuen [a] and Francis Verpoort\*<sup>[a, b, c]</sup>

[a] State Key Laboratory of Advanced Technology for Materials Synthesis and Processing, Wuhan University of Technology, Wuhan 430070 (P.R. China)

[b] National Research Tomsk Polytechnic University, Lenin Avenue 30, 634050 Tomsk (Russian Federation)

[c] Ghent University, Global Campus, Songdo, Ywonsu-Gu, Incheon (Republic of Korea)

[d] Chemistry Department, Faculty of Science, Fayoum University, Fayoum 63514 (Egypt)

E-mail: [francis.verpoort@ugent.be](mailto:francis.verpoort@ugent.be)

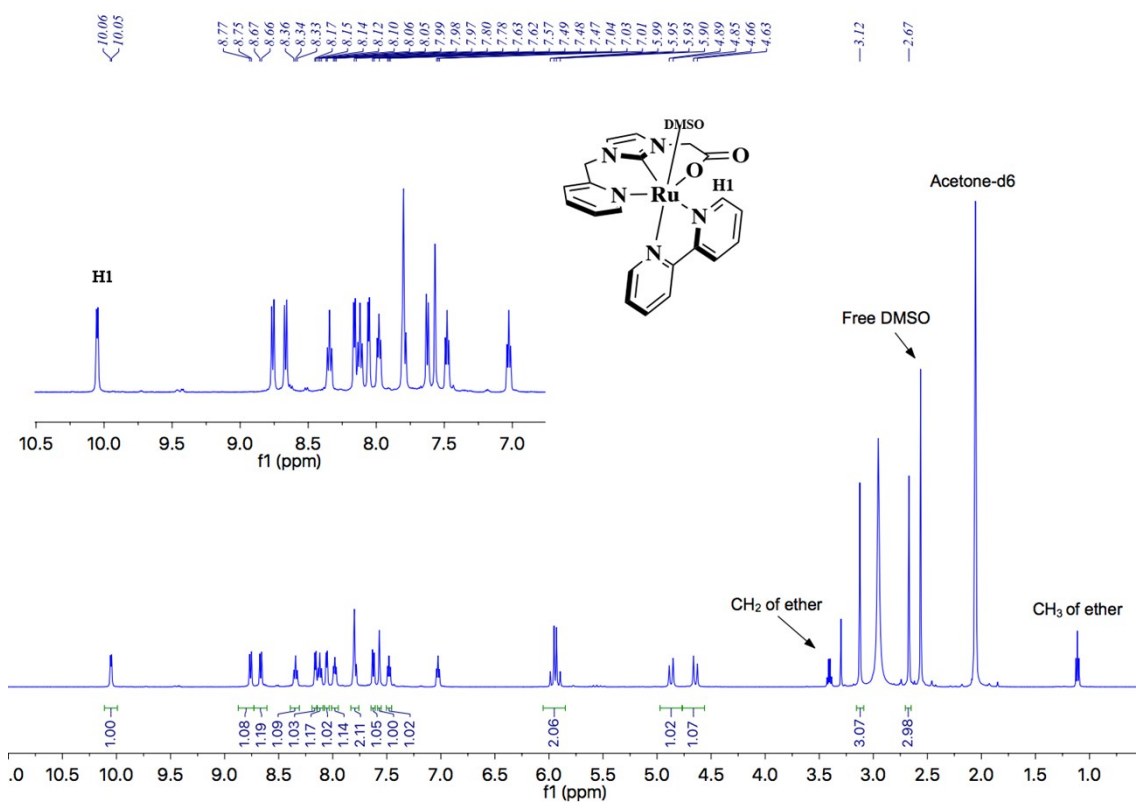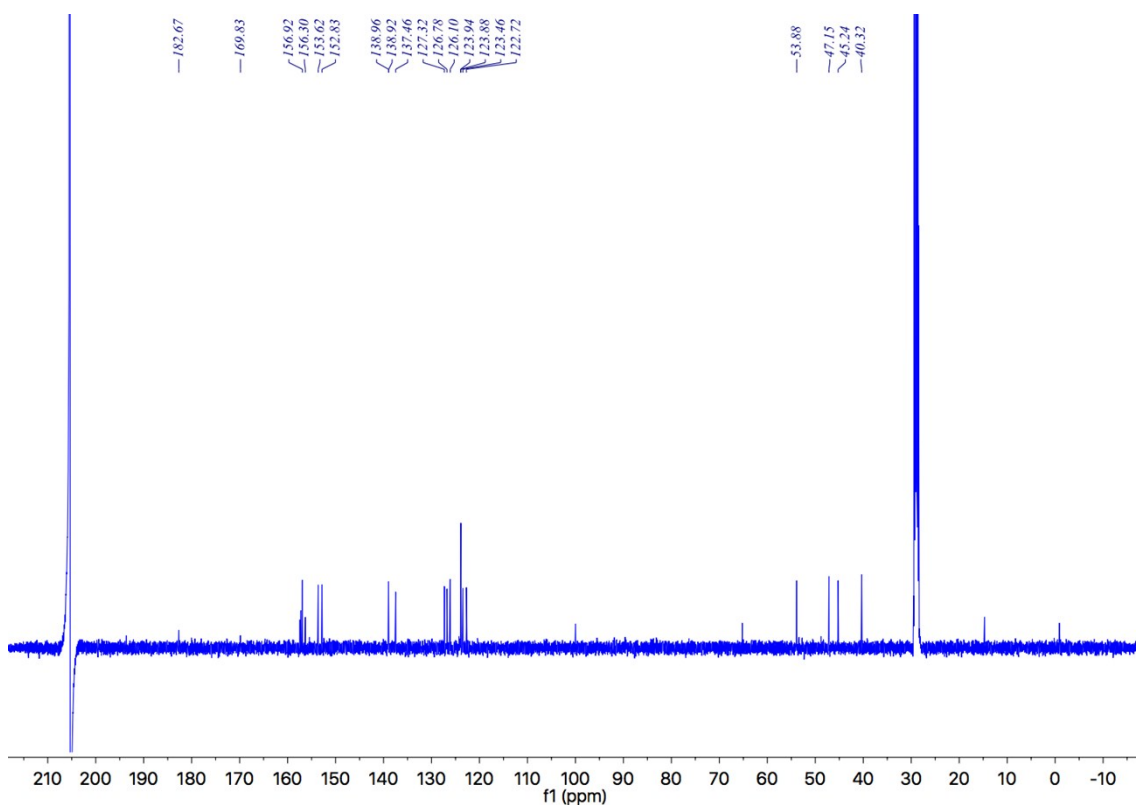

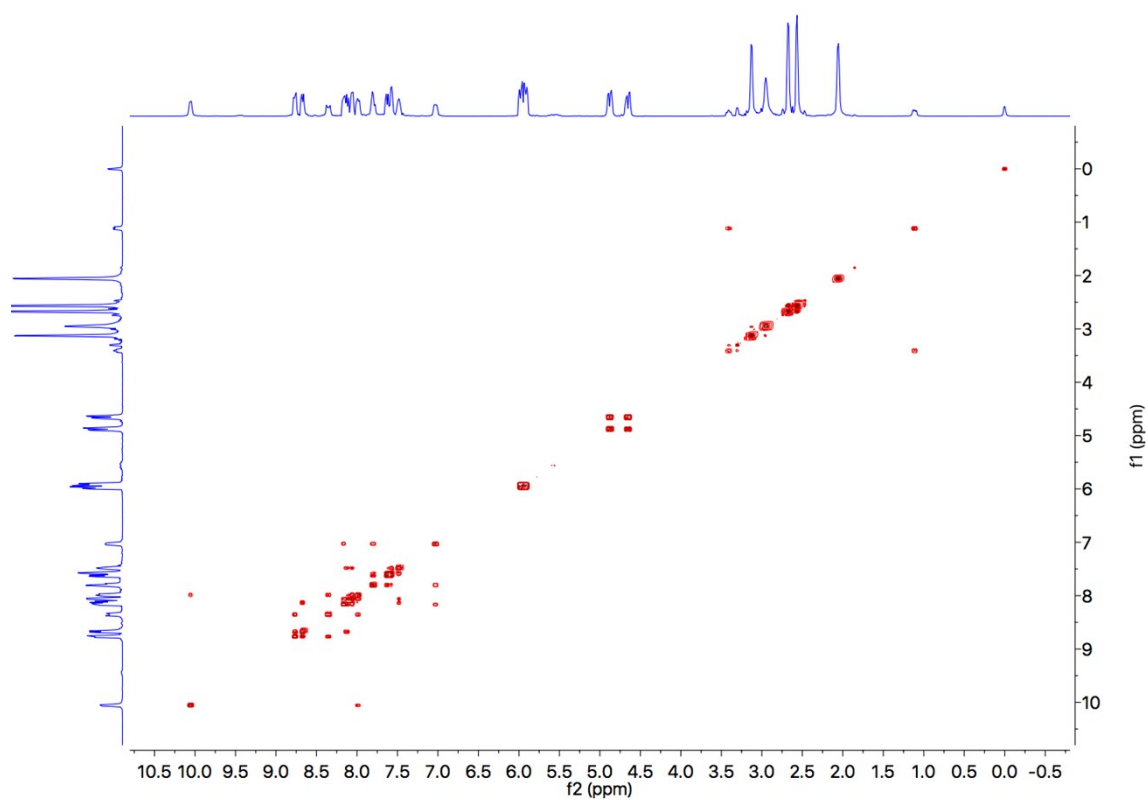

Figure S3. H-H COSY NMR spectrum of complex **1** in acetone-*d*<sub>6</sub> at 298 K.

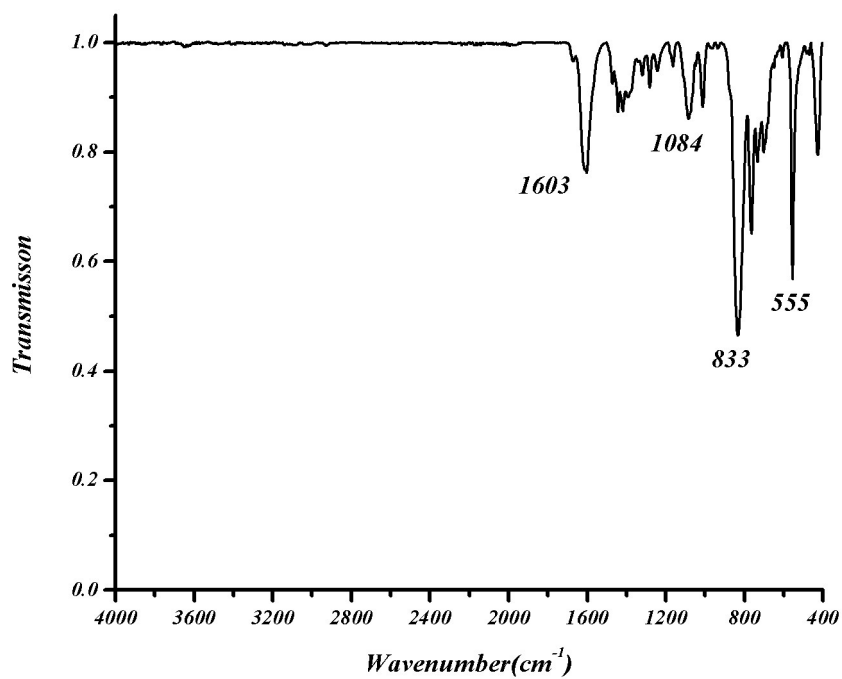

Figure S4. FT-IR of complex **1**.

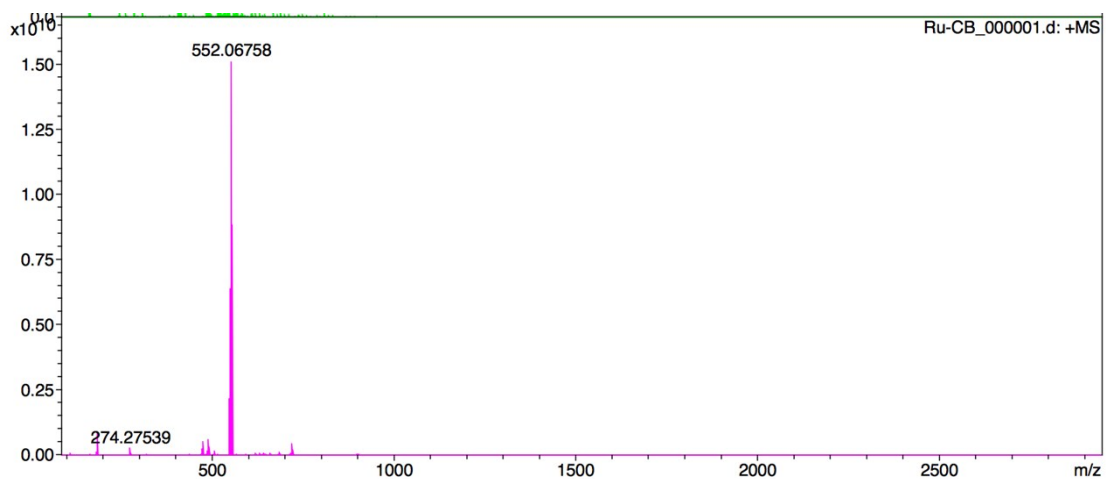

Figure S5. Mass spectrum of complex 1 in H<sub>2</sub>O at positive mode.

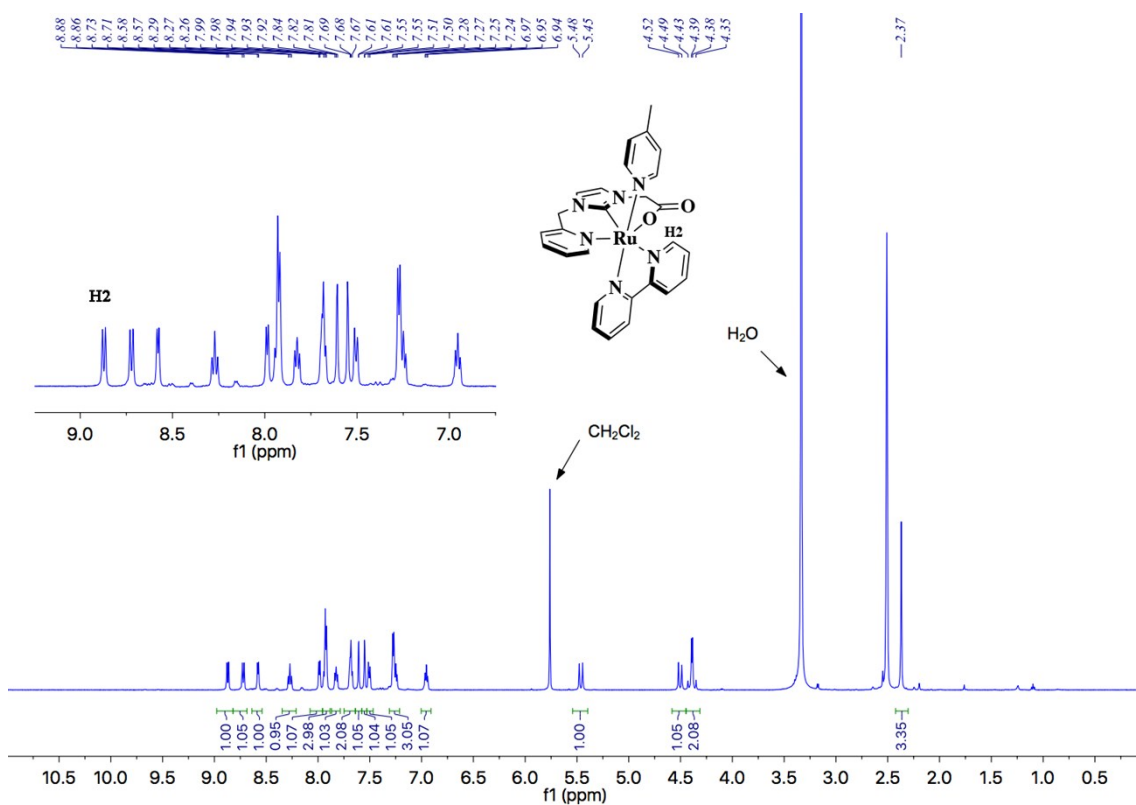

Figure S6. <sup>1</sup>H NMR spectrum of complex 2 in DMSO-d<sub>6</sub> at 298 K.

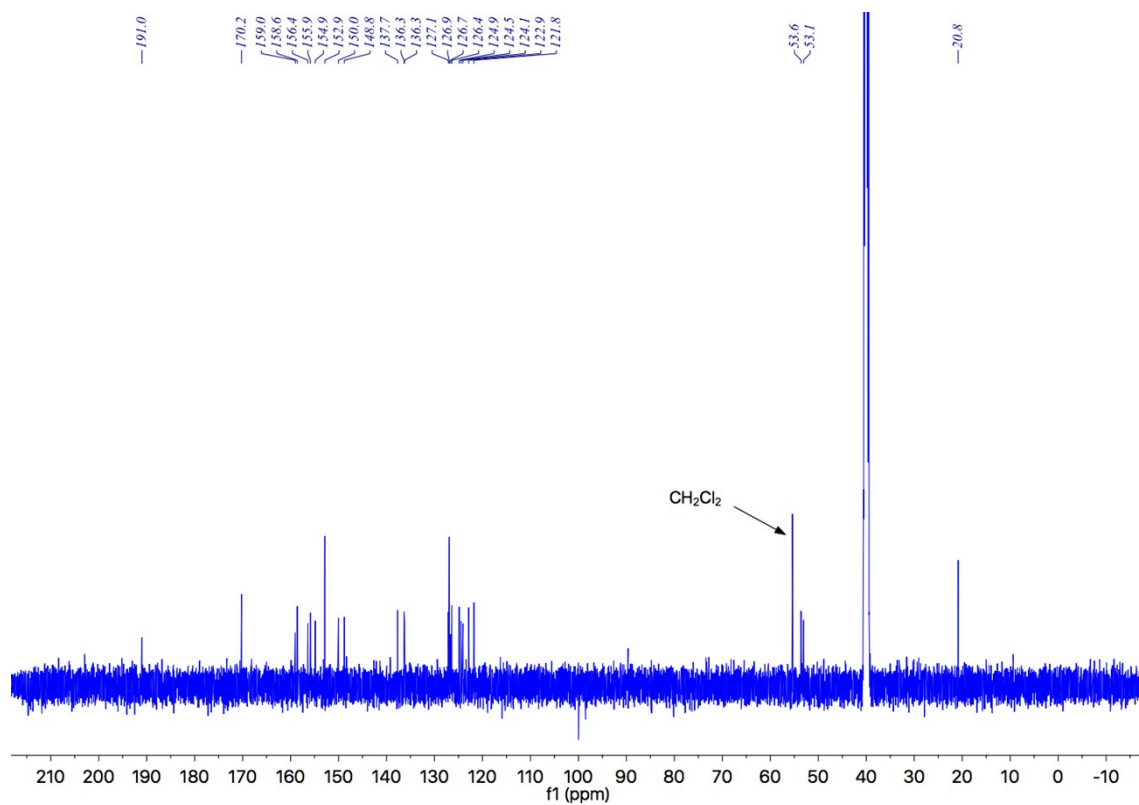

**Figure S7.**  $^{13}\text{C}$  NMR spectrum of complex **2** in  $\text{DMSO-d}_6$  at 298 K.

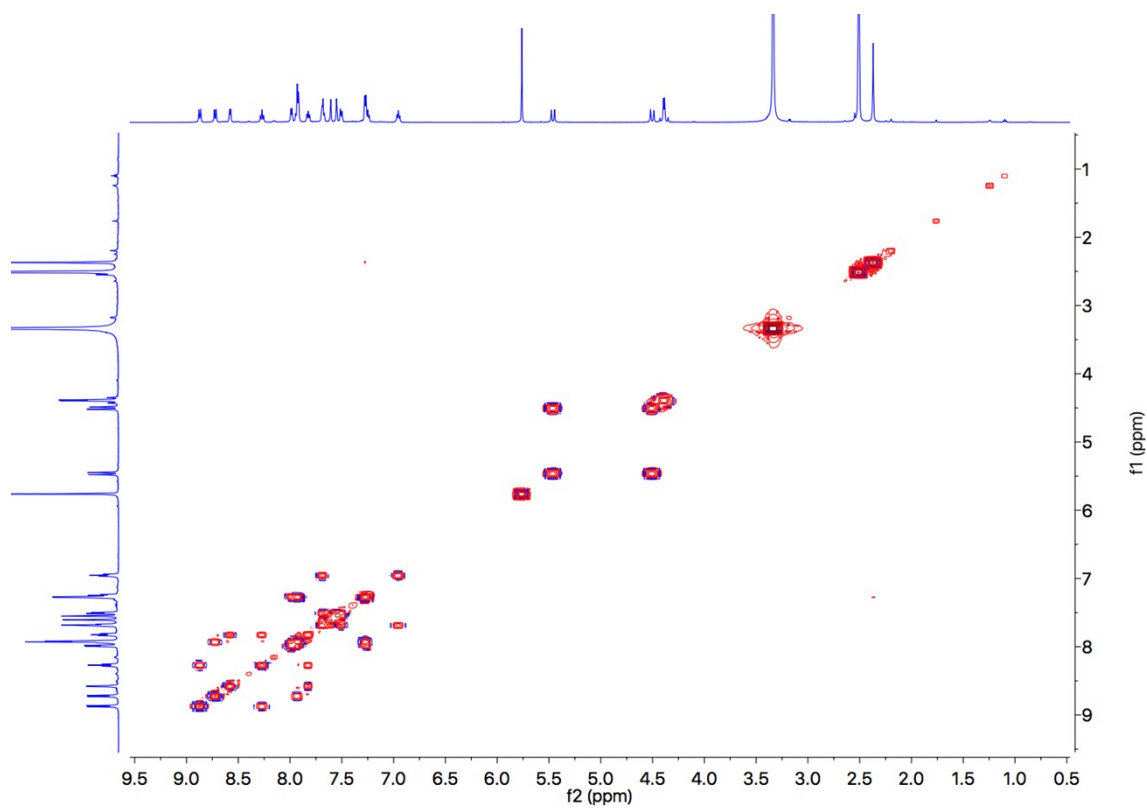

**Figure S8.** H-H COSY NMR spectrum of complex **2** in  $\text{DMSO-d}_6$  at 298 K.

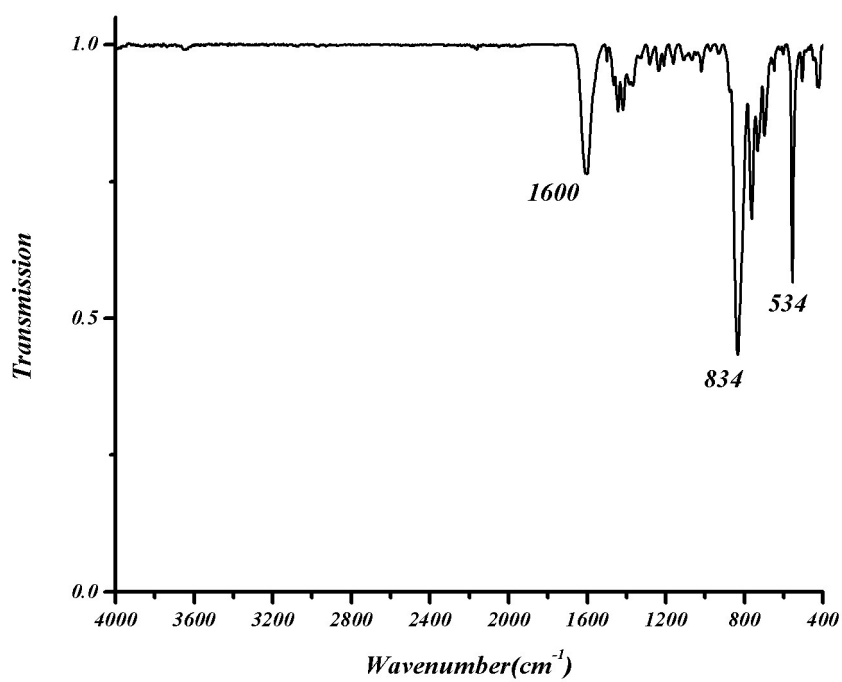

Figure S9. FT-IR of complex 2.

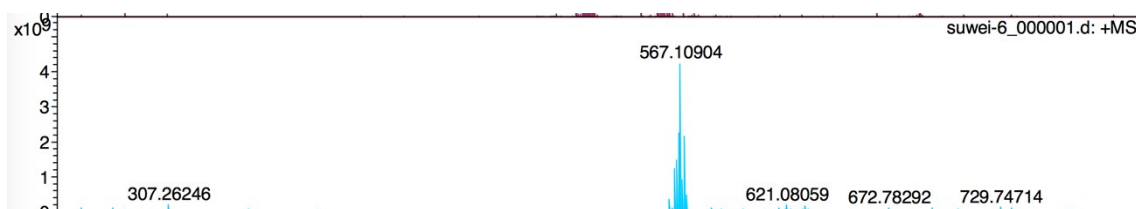

Figure S10. Mass spectrum of complex 2 in H<sub>2</sub>O at positive mode.

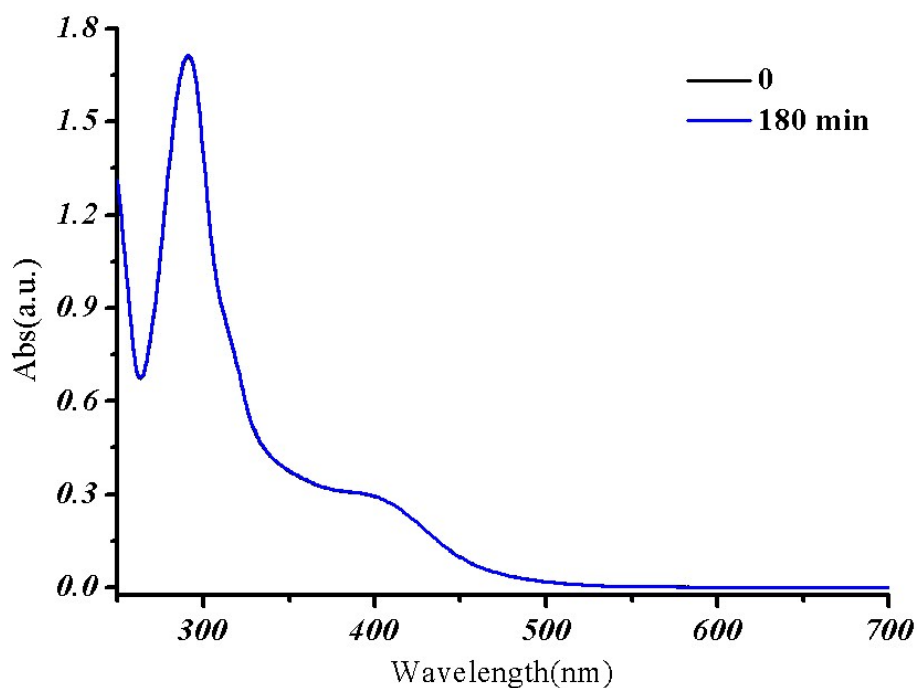

**Figure S11.** UV-Vis spectral changes of complex **1** in pH 1 aqueous solution (adjusted by  $\text{CF}_3\text{SO}_3\text{H}$ ) over a period of 180 min.

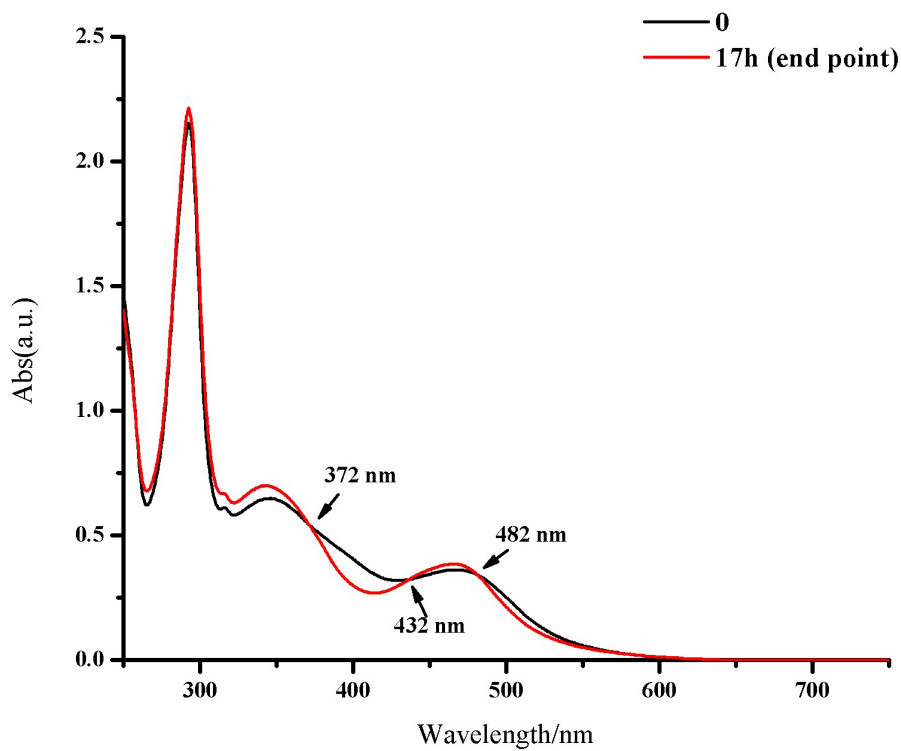

**Figure S12.** UV-Vis spectra of complex **2** and the species after complete transformation.

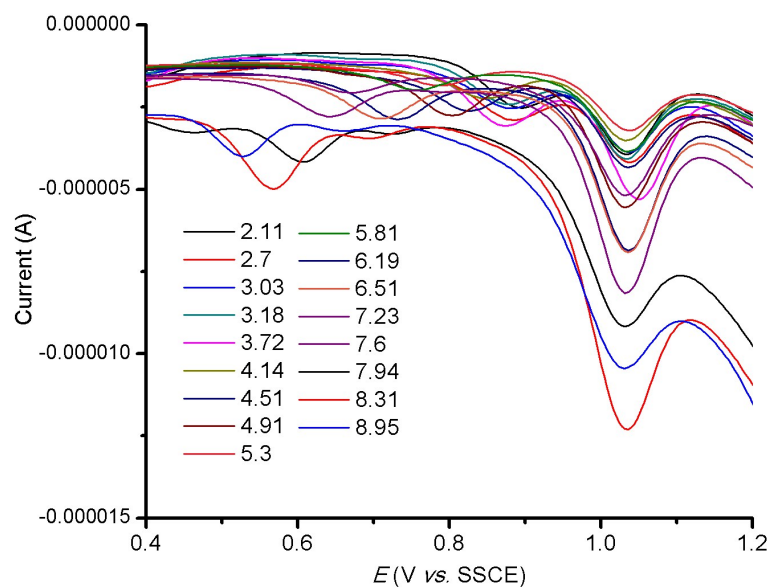

**Figure S13.** Differential pulse voltammograms for complex **1** at various of pH.

**Table S1.** Redox potentials of complex **1** and **2** in pH 1.0 CF<sub>3</sub>SO<sub>3</sub>H aqueous solution\*.

| Complex  | Ru <sup>III/II</sup> (V) | Ru <sup>IV/III</sup> (V) | Ru <sup>IV/II</sup> (V) | Ru <sup>V/IV</sup> (V) |
|----------|--------------------------|--------------------------|-------------------------|------------------------|
| <b>1</b> | -                        | -                        | 0.942                   | 1.250                  |
| <b>2</b> | 0.464                    | 0.623                    | -                       | 0.886                  |

\*Redox potentials were attained from differential pulse voltammetry.

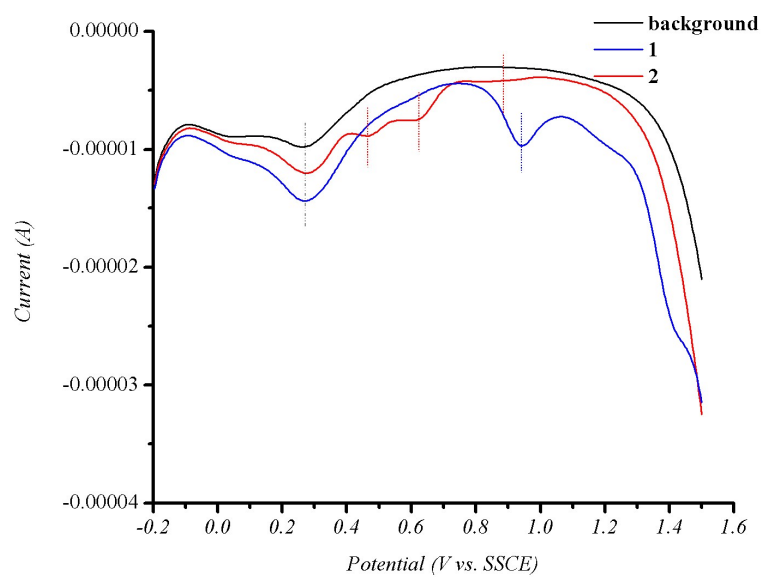

**Figure S14.** Differential pulse voltammograms for complex **1** and **2** in pH 1.0 CF<sub>3</sub>SO<sub>3</sub>H aqueous solution.



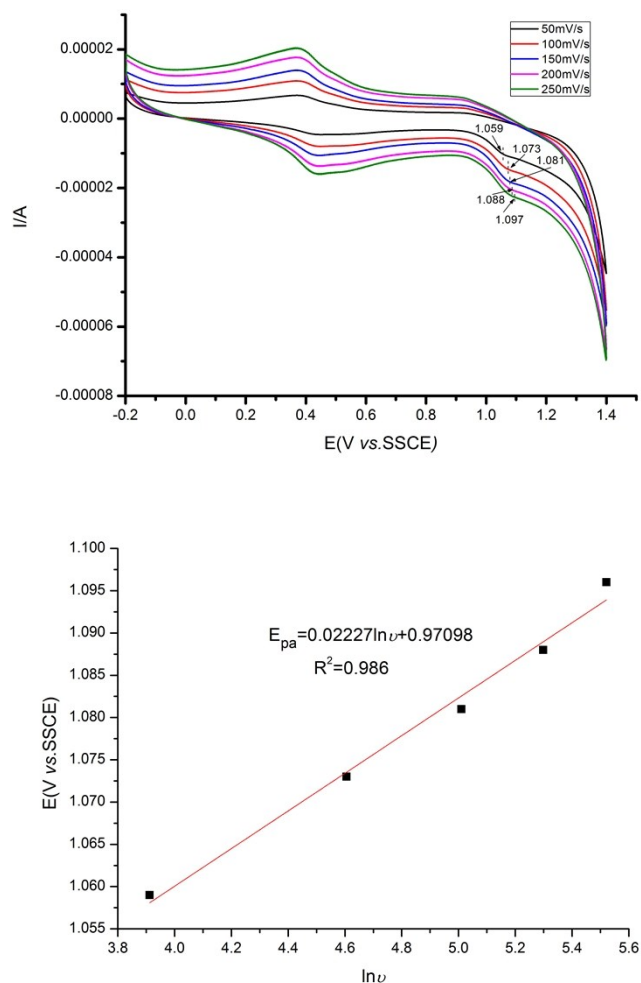

**Figure S15.** Top: cyclic voltammograms of complex **1** at different scan rates in pH 1.0 CF<sub>3</sub>SO<sub>3</sub>H aqueous solution. Bottom: linear fitting of  $E_{pa}$  versus  $\ln \nu$ .

Potential for redox couple at  $E_{pa} = 1.059$  V (vs. SSCE, 50 mV/s) varied linearly with  $\ln \nu$ , according to the following equation<sup>[S1]</sup>:

$$E_{pa} = E^{\theta} + \frac{RT}{\alpha nF} \cdot \ln \left[ \frac{RTk^{\theta}}{\alpha nF} \right] + \left[ \frac{RT}{\alpha nF} \right] \cdot \ln \nu$$

$\alpha$  is transfer coefficient,  $k^{\theta}$  is standard rate constant of the reaction,  $n$  is electron transfer number involved in the rate determining step,  $\nu$  is the scan rate, and  $E^{\theta}$  is formal potential,  $T = 298$  K,  $R = 8.314$  J·mol<sup>-1</sup>·K<sup>-1</sup>, and  $F = 96480$  C·mol<sup>-1</sup>. From the plot of  $E_{pa}$  versus  $\ln \nu$ , a slope of 0.02227 was attained, which equals to  $RT/\alpha nF$ . Thus, assuming that  $\alpha$  is 0.5<sup>[S2]</sup>,  $n = 2.28$ . This redox couple is a 2-electron redox process.

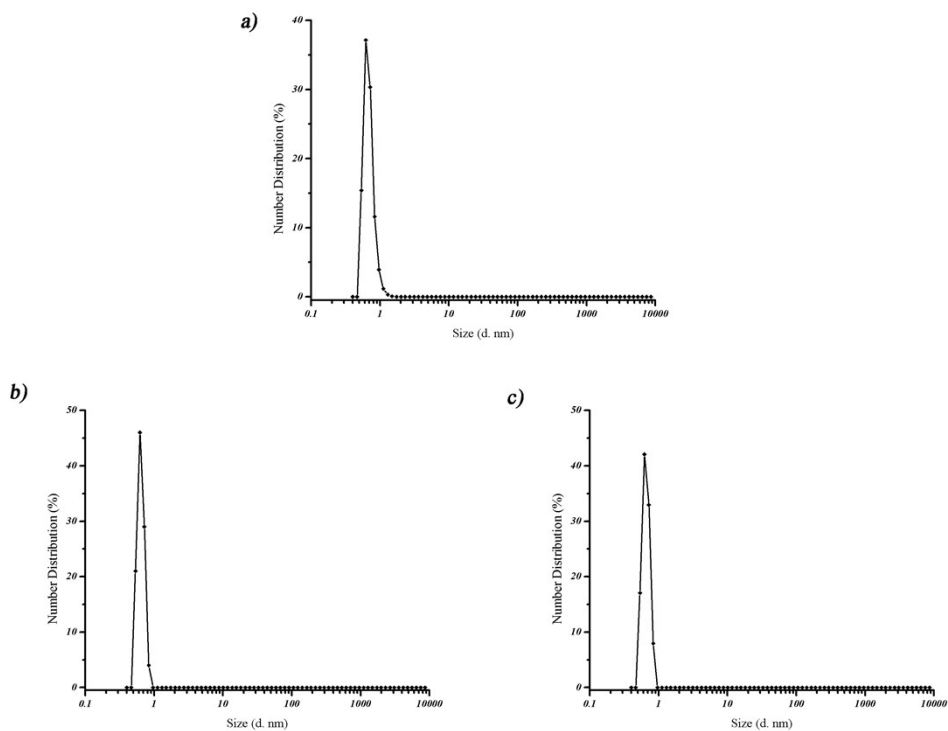

**Figure S16.** DLS measurements for (a)  $Ce^{IV}$  solution without catalysts and catalytic systems incorporating (b) complex **1** and (c) complex **2** after 3.5 h catalysis.

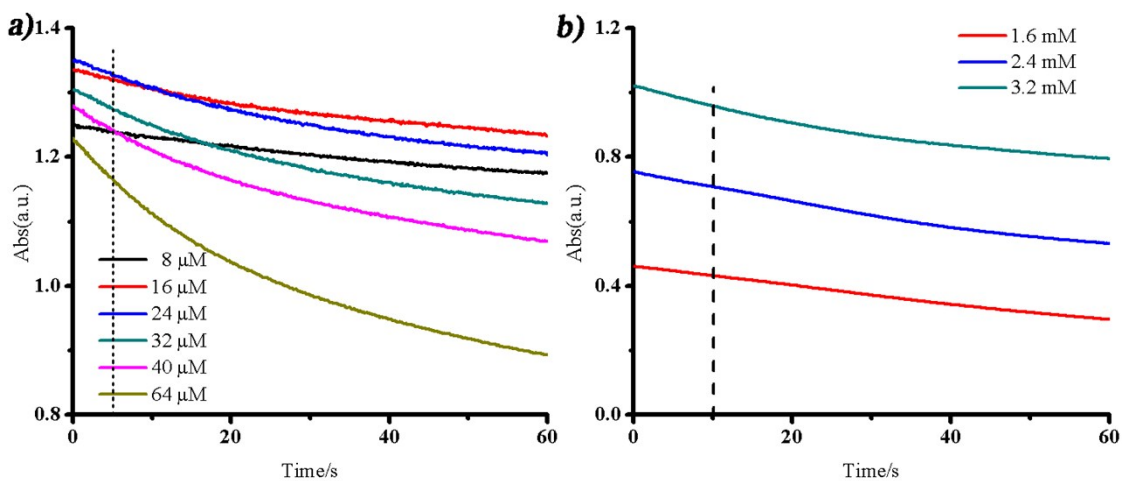

**Figure S17.** (a) Absorbance changes (360 nm) at various concentration of **1**. Conditions: initial  $[Ce^{IV}] = 3.2$  mM, pH 1.05  $CF_3SO_3H$  aqueous solution. (b) Absorbance changes (360 nm) at various concentration of  $[Ce^{IV}]$  in the presence of **1**. Conditions: initial  $[1] = 0.08$  mM, pH 1.05  $CF_3SO_3H$  aqueous solution.

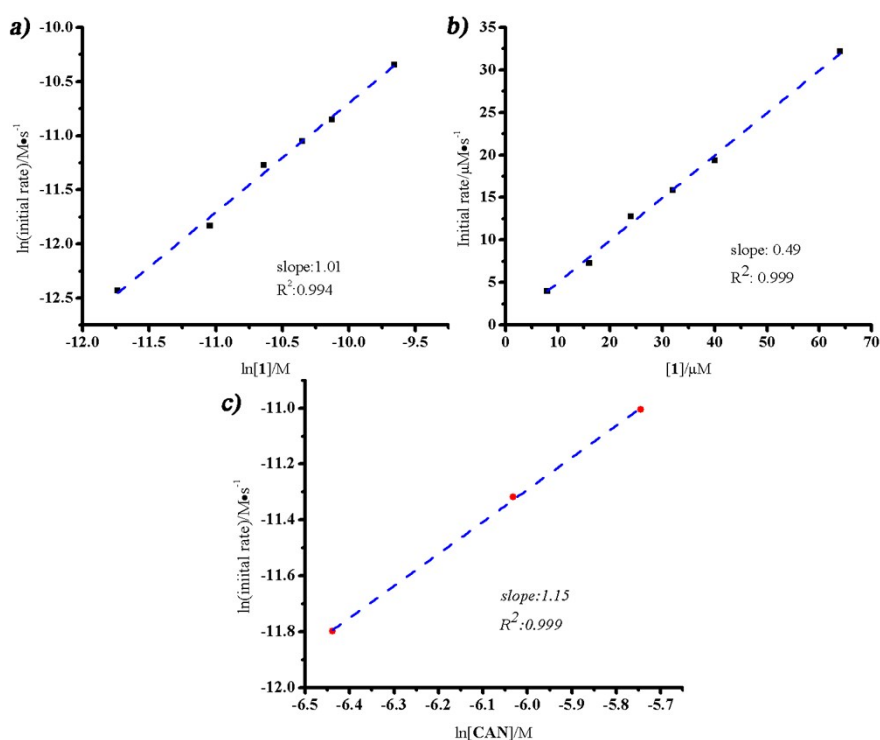

**Figure S18.** Kinetics data for  $[Ce^{IV}]$  catalysed by complex  $[1]PF_6$  in pH 1.05  $CF_3SO_3H$  aqueous solution. a) Natural logarithm of initial rate of  $[Ce^{IV}]$  consumption versus natural logarithm of concentration of  $[1]$ . b) Initial rate of  $[Ce^{IV}]$  consumption vs. concentration of  $[1]PF_6$ . c) Natural logarithm of initial rate of  $[Ce^{IV}]$  consumption versus natural logarithm of concentration of  $[Ce^{IV}]$  in the presence of  $1$ .

It is known that concentrations of catalyst ( $[cat]$ ) and oxidant ( $[Ce^{IV}]$ ) play roles on the initial rate, thus the rate law of  $Ce^{IV}$  consumption could be expressed as :

$$\text{Initial rate} = k \cdot [cat]^m \cdot [Ce]^{n_1}$$

$$\ln(\text{initial rate}) = \ln(K) + m \cdot \ln([cat]) + n \cdot \ln([Ce^{IV}])$$

herein,  $m$  and  $n$  are the orders of  $Ce^{IV}$  consumption (namely, water oxidation) depending on  $[cat]$  and  $[Ce^{IV}]$ . Therefore, from the plot of  $\ln(\text{initial rate})$  vs.  $\ln([cat])$  and  $\ln(\text{initial rate})$  vs.  $\ln([Ce^{IV}])$ , we could know that the water oxidation at initial stage is of pseudo-first order on concentration of both complex  $1$  and  $Ce^{IV}$ .

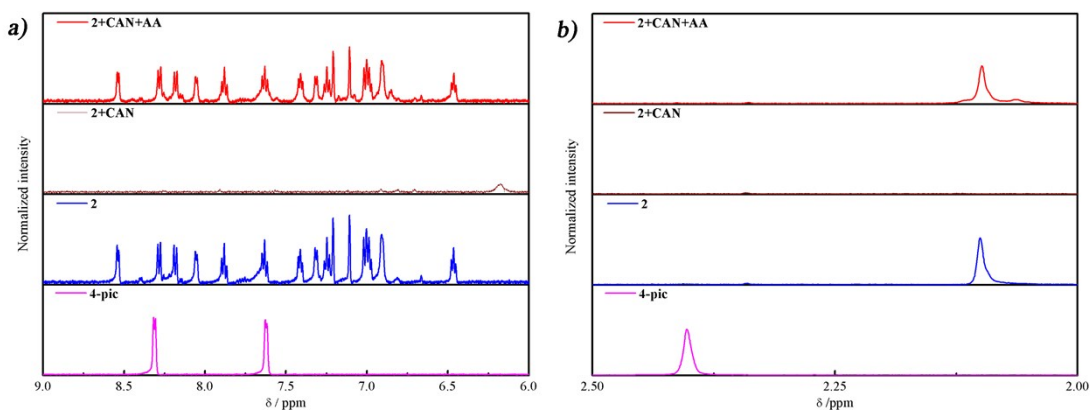

**Figure S19.**  $^1H$  NMR spectral changes of complex  $2$  in (a) 6 – 10 ppm and (b) 2- 3 ppm titrated with  $Ce^{IV}$  and AA. Conditions:  $[2] = 10$  mM, 70 equivalents of  $CF_3SO_3H$ , 0.5 mL  $D_2O$ .

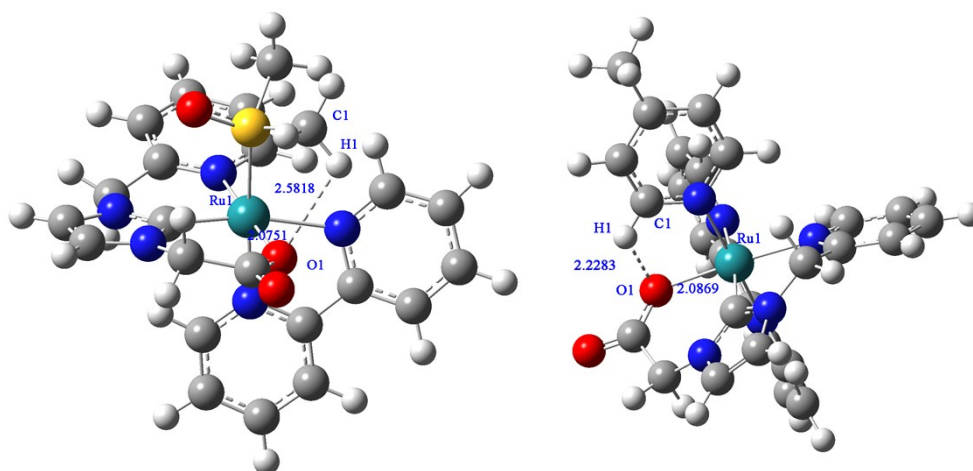

**Figure S20.** Calculated structures of complex **[1]<sup>+</sup>** (left) and **[2]<sup>+</sup>** (right).

**Computational details.** The geometry optimizations in the present study were performed using the Gaussian 09<sup>[S3]</sup> package and the B3LYP<sup>[S4]</sup> functional. 6-31G(d,p) basis set and 6-31G\*(d,p) basis set were applied for the C,N, O, H, S elements for complex **2** and **1**, respectively. And the SDD<sup>[S5]</sup> pseudopotential was applied for Ru.

**Table S2.** Cartesian coordinates for **1<sup>+</sup>**.

| Center Number | Atomic Number | Atomic Type | Coordinates(Angstroms) |           |          |
|---------------|---------------|-------------|------------------------|-----------|----------|
|               |               |             | X                      | Y         | Z        |
| 1             | 6             | 0           | -2.270193              | -1.549502 | 1.373416 |
| 2             | 6             | 0           | -3.001843              | -2.692254 | 1.715608 |
| 3             | 6             | 0           | -2.456861              | -3.960032 | 1.535723 |
| 4             | 6             | 0           | -1.164027              | -4.049857 | 1.024186 |
| 5             | 6             | 0           | -0.50876               | -2.879483 | 0.665639 |
| 6             | 7             | 0           | -1.043188              | -1.640705 | 0.798683 |
| 7             | 1             | 0           | -3.02225               | -4.84825  | 1.799    |
| 8             | 1             | 0           | -3.99455               | -2.57835  | 2.138626 |
| 9             | 1             | 0           | -0.669527              | -5.006186 | 0.887901 |
| 10            | 1             | 0           | 0.487185               | -2.906602 | 0.242942 |
| 11            | 6             | 0           | -2.837122              | -0.220488 | 1.842088 |
| 12            | 1             | 0           | -3.913528              | -0.341976 | 1.984502 |
| 13            | 1             | 0           | -2.412877              | -0.028865 | 2.839633 |
| 14            | 6             | 0           | -3.483368              | 2.071622  | 1.061054 |

|    |    |   |           |           |           |
|----|----|---|-----------|-----------|-----------|
| 15 | 6  | 0 | -1.543153 | 1.21446   | 0.252638  |
| 16 | 1  | 0 | -4.40897  | 2.077475  | 1.615839  |
| 17 | 6  | 0 | -2.890124 | 3.027663  | 0.308089  |
| 18 | 1  | 0 | -3.209437 | 4.027816  | 0.058049  |
| 19 | 7  | 0 | -2.642932 | 0.959984  | 1.014855  |
| 20 | 7  | 0 | -1.699389 | 2.492257  | -0.172299 |
| 21 | 6  | 0 | -0.863511 | 3.203389  | -1.150662 |
| 22 | 1  | 0 | -0.776594 | 4.242107  | -0.820266 |
| 23 | 1  | 0 | -1.398456 | 3.206961  | -2.108986 |
| 24 | 6  | 0 | 0.583874  | 2.7255    | -1.443247 |
| 25 | 8  | 0 | 1.007056  | 1.556677  | -1.060484 |
| 26 | 8  | 0 | 1.248959  | 3.514187  | -2.099696 |
| 27 | 6  | 0 | 2.909187  | -0.453557 | 0.38023   |
| 28 | 6  | 0 | 2.369798  | -1.679638 | -1.51151  |
| 29 | 6  | 0 | 4.274051  | -0.640196 | 0.129287  |
| 30 | 6  | 0 | 3.706146  | -1.915289 | -1.816303 |
| 31 | 1  | 0 | 5.0187    | -0.200695 | 0.781875  |
| 32 | 1  | 0 | 3.968138  | -2.497815 | -2.692897 |
| 33 | 6  | 0 | 2.410451  | 0.289586  | 1.556586  |
| 34 | 6  | 0 | 0.564907  | 1.186806  | 2.656382  |
| 35 | 6  | 0 | 3.246409  | 0.702621  | 2.601212  |
| 36 | 6  | 0 | 1.34074   | 1.622297  | 3.723584  |
| 37 | 1  | 0 | -0.500299 | 1.378373  | 2.631372  |
| 38 | 1  | 0 | 4.308582  | 0.492319  | 2.567262  |
| 39 | 1  | 0 | 0.873231  | 2.144829  | 4.55166   |
| 40 | 7  | 0 | 1.960246  | -0.960522 | -0.451465 |
| 41 | 6  | 0 | 4.680246  | -1.372444 | -0.980776 |
| 42 | 1  | 0 | 5.735886  | -1.513208 | -1.188675 |
| 43 | 6  | 0 | 2.713139  | 1.376866  | 3.694121  |
| 44 | 1  | 0 | 3.356708  | 1.70175   | 4.505565  |
| 45 | 7  | 0 | 1.071928  | 0.53195   | 1.593339  |
| 46 | 44 | 0 | -0.013389 | 0.001435  | -0.141041 |

|    |    |   |           |           |           |
|----|----|---|-----------|-----------|-----------|
| 47 | 1  | 0 | 1.58788   | -2.07844  | -2.148183 |
| 48 | 8  | 0 | -2.417922 | 0.270756  | -2.394105 |
| 49 | 6  | 0 | -0.003543 | 0.074274  | -3.608974 |
| 50 | 1  | 0 | -0.078994 | -0.670917 | -4.405652 |
| 51 | 1  | 0 | -0.394775 | 1.03236   | -3.959491 |
| 52 | 1  | 0 | 1.02151   | 0.206521  | -3.261147 |
| 53 | 6  | 0 | -1.366742 | -2.156191 | -2.620807 |
| 54 | 1  | 0 | -0.42601  | -2.708822 | -2.677993 |
| 55 | 1  | 0 | -2.013209 | -2.585691 | -1.852783 |
| 56 | 1  | 0 | -1.882553 | -2.166753 | -3.583048 |
| 57 | 16 | 0 | -1.084766 | -0.400732 | -2.192014 |

**Table S3.** Cartesian coordinates for 2<sup>+</sup>.

| Center<br>Number | Atomic<br>Number | Atomic<br>Type | Coordinates(Angstroms) |           |           |
|------------------|------------------|----------------|------------------------|-----------|-----------|
|                  |                  |                | X                      | Y         | Z         |
| 1                | 6                | 0              | -0.616735              | -2.351501 | 1.818391  |
| 2                | 6                | 0              | -0.488975              | -3.142584 | 2.961815  |
| 3                | 6                | 0              | 0.2489                 | -2.691998 | 4.053847  |
| 4                | 6                | 0              | 0.849545               | -1.438573 | 3.963854  |
| 5                | 6                | 0              | 0.696256               | -0.704276 | 2.795313  |
| 6                | 7                | 0              | -0.017187              | -1.13093  | 1.72371   |
| 7                | 1                | 0              | 0.349766               | -3.302001 | 4.94535   |
| 8                | 1                | 0              | -0.976183              | -4.111693 | 2.991323  |
| 9                | 1                | 0              | 1.433061               | -1.026989 | 4.780152  |
| 10               | 1                | 0              | 1.152579               | 0.271716  | 2.687664  |
| 11               | 6                | 0              | -1.518846              | -2.837219 | 0.697214  |
| 12               | 1                | 0              | -1.794314              | -3.875031 | 0.892217  |
| 13               | 1                | 0              | -2.443892              | -2.247385 | 0.702376  |
| 14               | 6                | 0              | -1.063991              | -3.717253 | -1.650454 |
| 15               | 6                | 0              | -0.316051              | -1.645506 | -1.091964 |
| 16               | 1                | 0              | -1.538779              | -4.673958 | -1.499179 |

|    |    |   |           |           |           |
|----|----|---|-----------|-----------|-----------|
| 17 | 6  | 0 | -0.507973 | -3.165183 | -2.758436 |
| 18 | 1  | 0 | -0.391645 | -3.557555 | -3.756381 |
| 19 | 7  | 0 | -0.929154 | -2.772904 | -0.634727 |
| 20 | 7  | 0 | -0.054509 | -1.897066 | -2.401239 |
| 21 | 6  | 0 | 0.67965   | -0.989736 | -3.293708 |
| 22 | 1  | 0 | 0.366015  | -1.196817 | -4.316824 |
| 23 | 1  | 0 | 1.751332  | -1.213227 | -3.226538 |
| 24 | 6  | 0 | 0.50827   | 0.540747  | -3.077999 |
| 25 | 8  | 0 | 0.234189  | 1.014538  | -1.896885 |
| 26 | 8  | 0 | 0.694411  | 1.223757  | -4.073869 |
| 27 | 6  | 0 | 2.864962  | 0.954564  | 0.130102  |
| 28 | 6  | 0 | 2.837293  | -1.325976 | -0.365425 |
| 29 | 6  | 0 | 4.263112  | 0.960598  | 0.062416  |
| 30 | 6  | 0 | 4.222561  | -1.380313 | -0.442126 |
| 31 | 1  | 0 | 2.231674  | -2.209069 | -0.528542 |
| 32 | 1  | 0 | 4.811432  | 1.87505   | 0.25118   |
| 33 | 1  | 0 | 4.71175   | -2.322109 | -0.66463  |
| 34 | 6  | 0 | -0.025601 | 2.947395  | 1.103421  |
| 35 | 6  | 0 | 2.071574  | 2.145191  | 0.49745   |
| 36 | 6  | 0 | 0.45814   | 4.240788  | 1.268414  |
| 37 | 6  | 0 | 2.621364  | 3.424933  | 0.630769  |
| 38 | 1  | 0 | -0.214527 | 5.035031  | 1.57237   |
| 39 | 1  | 0 | 3.668336  | 3.600168  | 0.416354  |
| 40 | 7  | 0 | 2.156846  | -0.190705 | -0.098318 |
| 41 | 7  | 0 | 0.750408  | 1.918001  | 0.724854  |
| 42 | 6  | 0 | 4.952123  | -0.209695 | -0.233164 |
| 43 | 1  | 0 | 6.035498  | -0.209713 | -0.289691 |
| 44 | 6  | 0 | 1.807717  | 4.484867  | 1.017677  |
| 45 | 1  | 0 | 2.220046  | 5.483669  | 1.1156    |
| 46 | 44 | 0 | 0.08427   | 0.004533  | -0.076909 |
| 47 | 1  | 0 | -1.072404 | 2.717351  | 1.265582  |
| 48 | 6  | 0 | -2.739041 | 0.526834  | 1.108201  |

|    |   |   |           |          |           |
|----|---|---|-----------|----------|-----------|
| 49 | 6 | 0 | -2.612961 | 1.022546 | -1.139851 |
| 50 | 6 | 0 | -4.063326 | 0.939837 | 1.168373  |
| 51 | 1 | 0 | -2.230774 | 0.166168 | 1.995507  |
| 52 | 6 | 0 | -3.936043 | 1.448615 | -1.152167 |
| 53 | 1 | 0 | -1.989556 | 1.080428 | -2.022543 |
| 54 | 1 | 0 | -4.588279 | 0.895247 | 2.11782   |
| 55 | 1 | 0 | -4.356672 | 1.818279 | -2.082208 |
| 56 | 6 | 0 | -4.706896 | 1.411536 | 0.015394  |
| 57 | 7 | 0 | -2.004887 | 0.552737 | -0.027563 |
| 58 | 6 | 0 | -6.149849 | 1.838612 | 0.02995   |
| 59 | 1 | 0 | -6.347202 | 2.603874 | -0.725001 |
| 60 | 1 | 0 | -6.802864 | 0.985353 | -0.190535 |
| 61 | 1 | 0 | -6.442765 | 2.229977 | 1.007739  |

#### Reference:

[S1] 1) H. S. Yin, Y. L. Zhou, S. Y. Ai, *J. Electroanal. Chem.* 2009, **626**, 80-88; 2) J. B. Raoof, A. Omrani, R. Ojani, F. Monfared, *J. Electroana. Chem.* 2009, **633**, 153-158; 3) E. Laviron, *J. Electroanal. Chem.* 1974, **52**, 355–393.

[S2] A. J. Bard, L. R. Faulkner, *Electrochemical Methods: Fundamentals and Applications*, OXFORD UNIVERSITY PRESS, 1992.

[S3]. Gaussian 09, Revision D.01, M. J. Frisch, G. W. Trucks, H. B. Schlegel, G. E. Scuseria, M. A. Robb, J. R. Cheeseman, G. Scalmani, V. Barone, B. Mennucci, G. A. Petersson, H. Nakatsuji, M. Caricato, X. Li, H. P. Hratchian, A. F. Izmaylov, J. Bloino, G. Zheng, J. L. Sonnenberg, M. Hada, M. Ehara, K. Toyota, R. Fukuda, J. Hasegawa, M. Ishida, T. Nakajima, Y. Honda, O. Kitao, H. Nakai, T. Vreven, J. A. Montgomery, Jr., J. E. Peralta, F. Ogliaro, M. Bearpark, J. J. Heyd, E. Brothers, K. N. Kudin, V. N. Staroverov, T. Keith, R. Kobayashi, J. Normand, K. Raghavachari, A. Rendell, J. C. Burant, S. S. Iyengar, J. Tomasi, M. Cossi, N. Rega, J. M. Millam, M. Klene, J. E. Knox, J. B. Cross, V. Bakken, C. Adamo, J. Jaramillo, R. Gomperts, R. E. Stratmann, O. Yazyev, A. J. Austin, R. Cammi, C. Pomelli, J. W. Ochterski, R. L. Martin, K. Morokuma, V. G. Zakrzewski, G. A. Voth, P. Salvador, J. J. Dannenberg, S. Dapprich, A. D. Daniels, O. Farkas, J. B. Foresman, J. V. Ortiz, J. Cioslowski, and D. J. Fox, Gaussian, Inc., Wallingford CT, 2013.



- [S4]. A. D. Becke, *J. Chem. Phys.* 1993, **98**, 5648-5652.
- [S5]. D. Andrae, U. Häußermann, M. Dolg, H. Stoll and H. Preuß, *Theor. Chim. Acta.* 1990, **77**, 123-141.
